# Supplementary material
Source: publisher figshare collection journal article supplement (https://gsapubs.figshare.com/articles/dataset/_/25571712)
Supplement: Supplementary file 1 [file 45559428]

## SUPPLEMENTARY MATERIAL

### **Paleomagnetic investigation of the basal Maieberg Formation (Namibia) cap carbonate sequence (635 Ma): Implications for Snowball Earth postglacial dynamics**

Thales Pescarini<sup>1</sup>, Ricardo I.F. Trindade<sup>1</sup>, Paul F. Hoffman<sup>2, 3</sup>, Lucy Gomes Sant'Anna<sup>4</sup>

<sup>1</sup>*Department of Geophysics, University of Sao Paulo, Sao Paulo, SP, Brazil*

<sup>2</sup>*Department of Earth and Planetary Sciences, Harvard University, Cambridge, MA, USA*

<sup>3</sup>*School of Earth and Ocean Sciences, University of Victoria, Victoria, BC, Canada*

<sup>4</sup>*Brazilian Institute of Energy and Environment, University of Sao Paulo, SP, Brazil*

#### **1. Additional rock magnetism information**

With the hysteresis curves, we also obtained the  $\Delta M$  (difference between the two branches of the hysteresis curve with paramagnetic correction), and its first derivative  $d(\Delta M)/dB$  (Fig. S.1). This method was introduced by Jackson *et al.* (1990) and explored by Tauxe *et al.* (1996) to separate mineral phases of different coercivities in a mixture. It is worth noting that both  $\Delta M$  and  $d(\Delta M)/dB$  are sensitive only to remanence-bearing phases and, therefore, do not provide any information about superparamagnetic (SP) type grains. In our samples, we see clearly that these carbonates have only one ferromagnetic phase that contributes to the remanence, since both the  $\Delta M$  curve and the  $d(\Delta M)/dB$  curve have only a single “ramp” (Fig. S.1). This phase is interpreted as magnetite, as predicted given the saturation below 250 mT and considering the other rock magnetic observations.

FORC diagrams are very enlightening in several aspects. In non-remagnetized samples carrying the  $C_1$  component, the diagram is typical of PSD magnetites, where we observe a peak at the origin and a dispersion in both the coercivity axis ( $B_c$ ) and the interaction axis ( $B_u$ ), resulting in an approximately triangular three-lobed geometry. (NA-3E, Fig. S.2.). When we analyze the FORCs of the remagnetized samples carrying the  $C_2$  component (NA-7A and 8D, Fig. S.2.) we observe that there is a shift of the main peak to higher values in  $B_c$ . Two peaks are frequently observed, one at the origin and the other shifted in  $B_c$ , around 50 mT. This can be especially well observed in the profiles along the  $B_u = 0$  axis. We interpret these observations to be consistent with a population of mostly PSD in the non-remagnetized samples and a mixture between SD and PSD magnetites grains in the remagnetized samples.

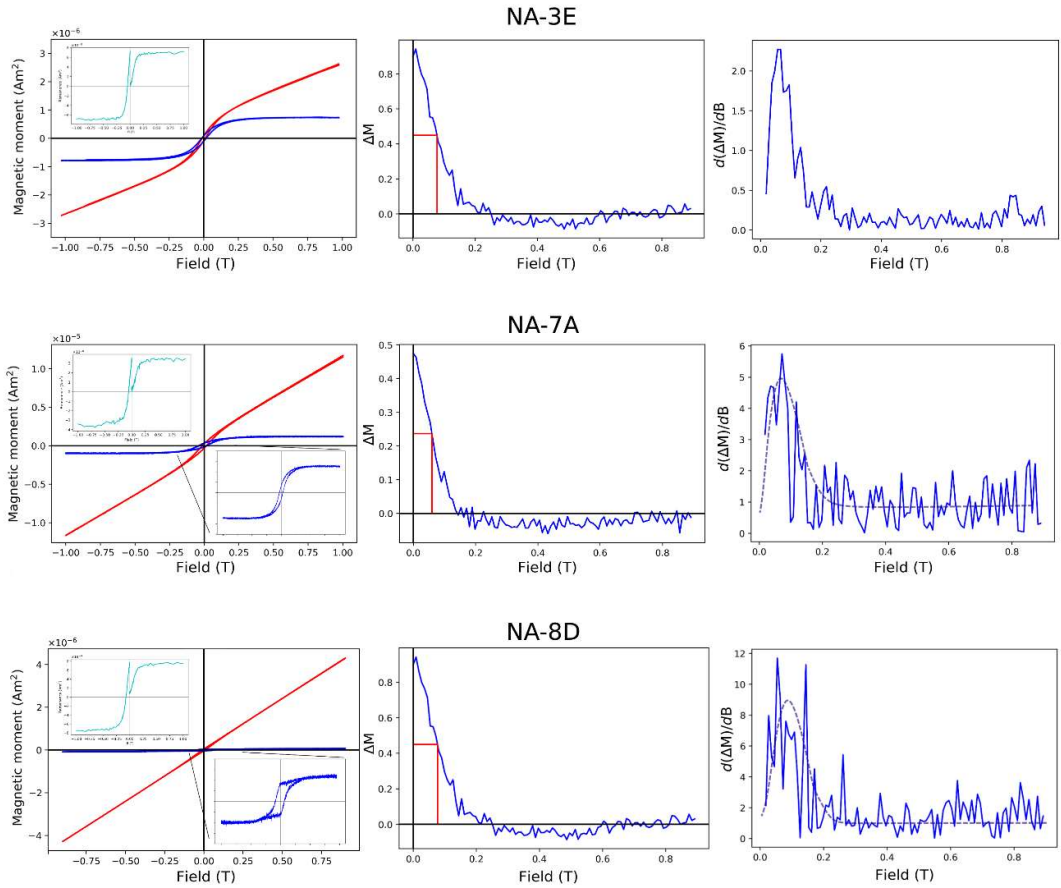

**Figure S1.** Representative hysteresis loops of Maieberg carbonates. The curves in red are without the application of paramagnetic correction and those in blue are with it. The  $\Delta M$  curve is the difference between the two branches of the corrected hysteresis curve. The  $d(\Delta M)/dB$  curve is the first derivative of the  $\Delta M$  curve. The NA-3E sample has the  $C_1$  magnetization component. Samples NA-7A and NA-8D have the  $C_2$  magnetization component (remagnetization).

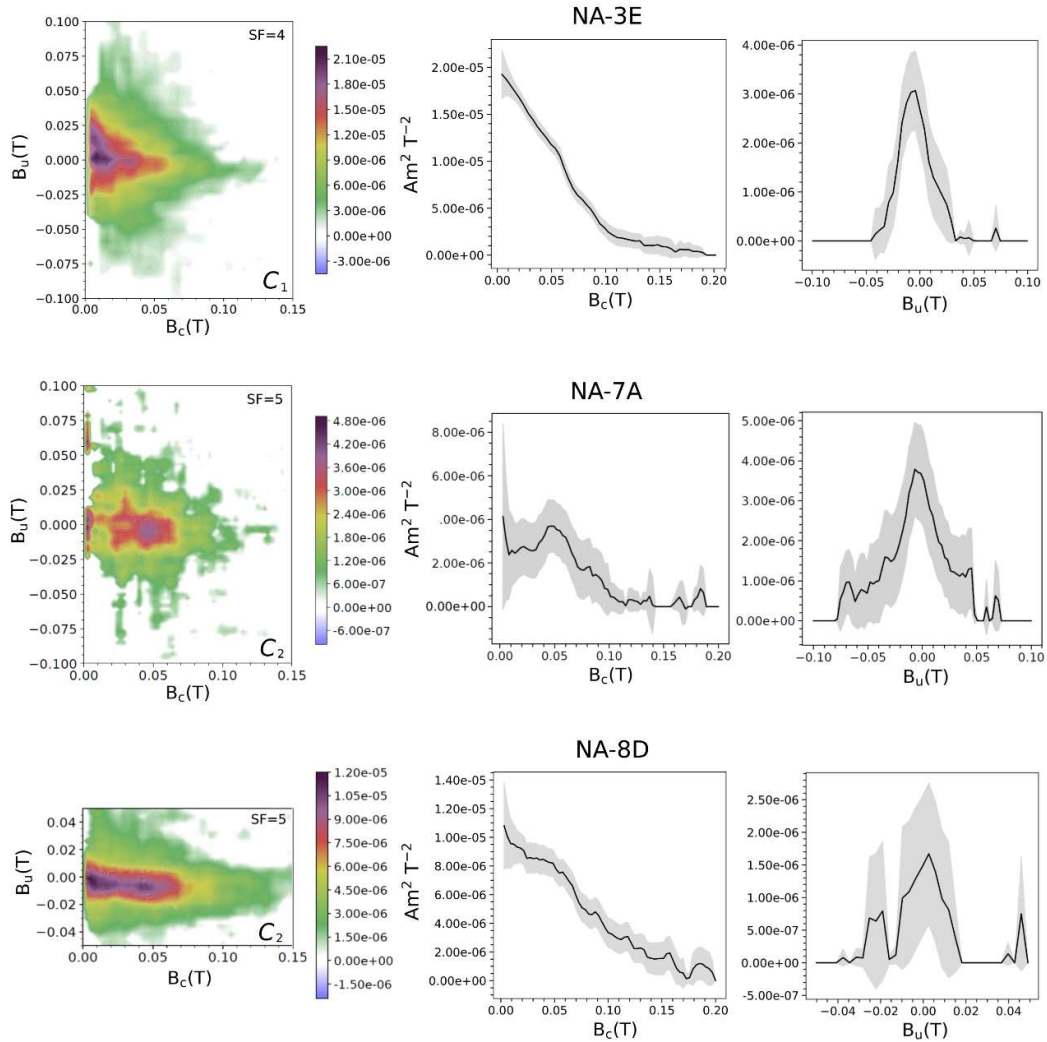

**Figure S2.** FORC diagrams of Maieberg carbonate samples. In the center and right are the profiles along the coercivity axis ( $B_c$ ) and the interaction axis ( $B_u$ ), respectively. The NA-3E sample carries the  $C_1$  component and the NA-7A and 8D samples the  $C_2$  component (remagnetization). Note the displacement of the main peak in the  $B_c$  axis in the remagnetized samples, indicative of a greater SD contribution in these samples. SF = Smoothing factor.

## 2. Bayesian reversal test

As stated in the main text, the calculated Bayes Factor (BF) for the hypothesis asserting a common mean for the two polarity sets of  $C_1$  is 3.10. Correspondingly, the associated hypothesis probability ( $p(H_A|X)$ ) is 76%. The plot of the directions rotated to the same polarity during the test execution is shown in Figure S.3.

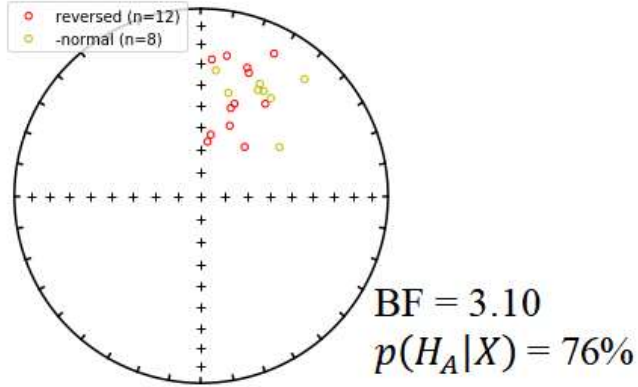

**Figure S3.** Bayesian reverse test of component  $C_1$ . The directions of polarity with positive inclination (here treated as “normal polarity”) were rotated to their antipodes. The numerical result of the test produces a  $BF = 3.10$  and  $e\ p(H_A|X) = 76\%$ , which corresponds to a test with positive support and a probability of 76% of the polarities presenting a common mean.

### 3. Individual remanence directions

Table S.1. shows statistical information about the discretized components in each of the samples that passed our minimum criteria ( $MAD < 13^\circ$ ,  $n \geq 4$ ) to enter the paleomagnetic pole calculations.

**Table S1**

Individual sample remanence directions.  $D$ : Declination;  $I$ : Inclination;  $n$ : demagnetization steps computed at the mean;  $MAD$ : maximum angular deviation.

| Sample | $D$ ( $^\circ$ ) | $I$ ( $^\circ$ ) | $n$ | $MAD$ ( $^\circ$ ) |
|--------|------------------|------------------|-----|--------------------|
| $C_1$  |                  |                  |     |                    |
| NA2A   | 215.5            | 36.1             | 7   | 5.3                |
| NA2B   | 238.1            | 49.1             | 5   | 7.8                |
| NA2D   | 22.1             | -52.3            | 4   | 12.8               |
| NA2E   | 256.2            | 53.6             | 5   | 10.1               |
| NA2G   | 16.3             | -49.4            | 5   | 5.9                |
| NA2H   | 28.5             | -14.7            | 11  | 5.2                |
| NA2J   | 18.2             | -49.1            | 4   | 5.7                |
| NA2N   | 21.8             | -29.4            | 4   | 7.7                |
| NA3E   | 210.1            | 32.5             | 5   | 9.0                |

|                      |       |       |    |      |
|----------------------|-------|-------|----|------|
| <b>NA4A</b>          | 208.3 | 36.0  | 4  | 2.3  |
| <b>NA4B</b>          | 13.5  | -28.3 | 4  | 5.8  |
| <b>NA4E</b>          | 212.1 | 32.7  | 4  | 10.9 |
| <b>NA4F</b>          | 221.4 | 16.0  | 6  | 11.5 |
| <b>NA4H</b>          | 6.1   | -61.4 | 5  | 1.1  |
| <b>NA4I</b>          | 6.7   | -66.2 | 4  | 5.9  |
| <b>NA4J</b>          | 41.7  | -61.3 | 5  | 11.8 |
| <b>NA5A</b>          | 186.7 | 33.0  | 4  | 6.5  |
| <b>NA6U</b>          | 10.4  | -24.9 | 15 | 9.4  |
| <b>NA10L</b>         | 40.0  | -37.2 | 7  | 7.4  |
| <b>NA10M</b>         | 8.9   | -40.7 | 7  | 1.5  |
| <b>C<sub>2</sub></b> |       |       |    |      |
| <b>NA7D</b>          | 327.8 | 62.9  | 4  | 9.2  |
| <b>NA7E</b>          | 4.8   | 58.6  | 4  | 11   |
| <b>NA7H</b>          | 344.8 | 37.2  | 4  | 5    |
| <b>NA7I</b>          | 329.4 | 69.4  | 4  | 8.3  |
| <b>NA7J</b>          | 357.4 | 42.7  | 4  | 4.4  |
| <b>NA7L</b>          | 330.5 | 51.3  | 5  | 4.5  |
| <b>NA7N</b>          | 312.9 | 72.9  | 6  | 8.2  |
| <b>NA7O</b>          | 334.3 | 56.1  | 8  | 6.8  |
| <b>NA7P</b>          | 343.7 | 55.2  | 16 | 5.5  |
| <b>NA7Q</b>          | 340.5 | 56.1  | 13 | 4.7  |
| <b>NA7R</b>          | 342.8 | 65.7  | 9  | 3.5  |
| <b>NA7S</b>          | 345.9 | 56.3  | 5  | 5.6  |
| <b>NA7T</b>          | 344.1 | 47.9  | 13 | 4.4  |
| <b>NA7U</b>          | 344.1 | 48.9  | 13 | 4.7  |
| <b>NA7V</b>          | 348.6 | 49.1  | 8  | 6.8  |

|              |       |      |    |     |
|--------------|-------|------|----|-----|
| <b>NA8A</b>  | 348.4 | 43.4 | 10 | 5   |
| <b>NA8B</b>  | 338.5 | 43.2 | 10 | 2   |
| <b>NA8C</b>  | 330.1 | 40.4 | 10 | 3.0 |
| <b>NA8D</b>  | 339.4 | 42.0 | 7  | 5.5 |
| <b>NA8F</b>  | 337.7 | 46   | 12 | 3.1 |
| <b>NA10H</b> | 27.5  | 58.1 | 8  | 3.9 |
| <b>NA10I</b> | 14.2  | 54.8 | 5  | 3.4 |
| <b>NA10J</b> | 7.3   | 53.4 | 7  | 5.0 |
| <b>NA10K</b> | 346.6 | 60.0 | 5  | 3.9 |

## REFERENCES

- Jackson, M., Worm, H-U., Banerjee, S.K., 1990. Fourier analysis of digital hysteresis data: rock magnetic applications. *Physics of the Earth and Planetary Interiors*. 65, 78-87.
- Tauxe, L., Mullender, T.A.T., Pick, T. 1996. Potbellies, wasp-waists, and Superparamagnetism in Magnetic Hysteresis. *Journal of Geophysical Res.* 571-584.
